# Supplementary material for: Hazard assessment of ingested polystyrene nanoplastics in Drosophila larvae
Source: Royal Society of Chemistry journal article supplement (doi:10.1039/d1en01199e), 2022-01-01
Supplement: d1en01199e1.pdf [file d1en01199e1.pdf]

# **Hazard assessment of ingested polystyrene nanoplastics in *Drosophila* larvae**

Mohamed Alaraby<sup>1,2</sup>, Doaa Abass<sup>1,2</sup>, Josefa Domenech<sup>1</sup>, Alba Hernández<sup>1</sup>, Ricard Marcos<sup>1,\*</sup>.

## **SUPPLEMENTARY INFORMATION**

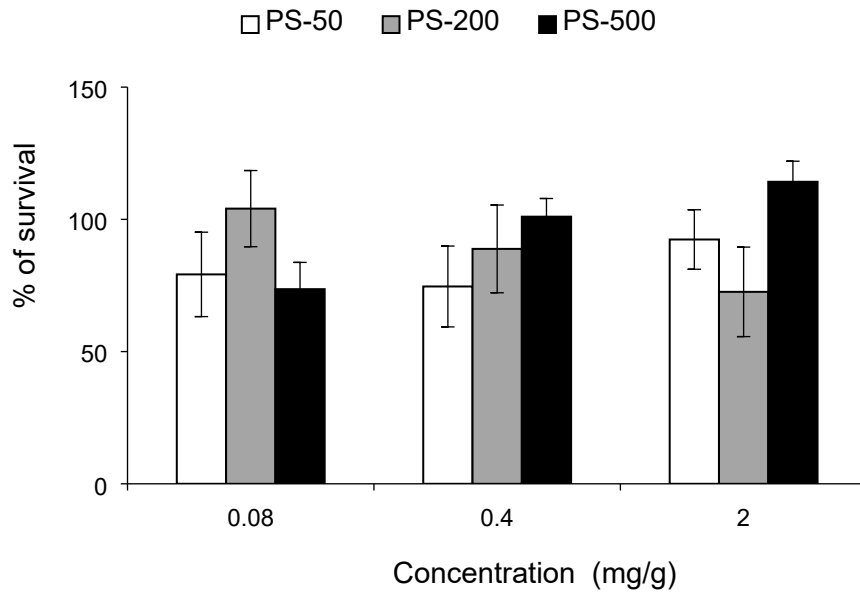

### Supplementary Figure 1

**Figure S1.** The survival rate of *Drosophila melanogaster* treated with different size of polystyrene. A total 250 eggs per dose were seeded (five replicates). Adults were collected, counted, and the percentage of emerged adults calculated and compared with that of unexposed individuals.
